# Supplementary material
Source: HighWire-hosted journal article supplement (https://bmjopen.bmj.com/content/14/7/e084228)
Supplement: inline-supplementary-material-1 [file inline-supplementary-material-1.pdf]

SUPPLEMENTARY MATERIALS

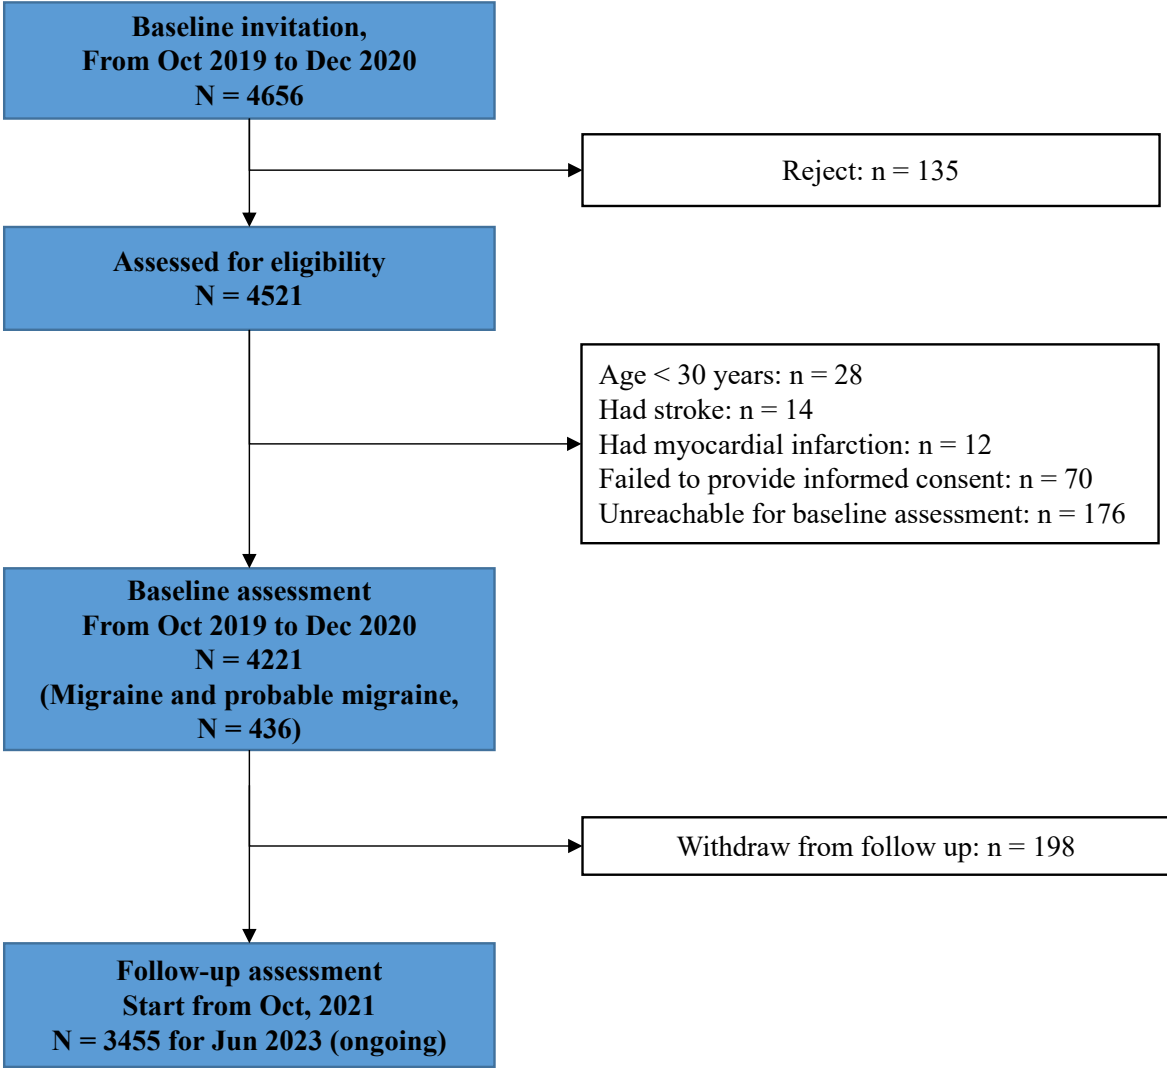

Supplemental Figure 1. Follow chart of the MECH-HK cohort.

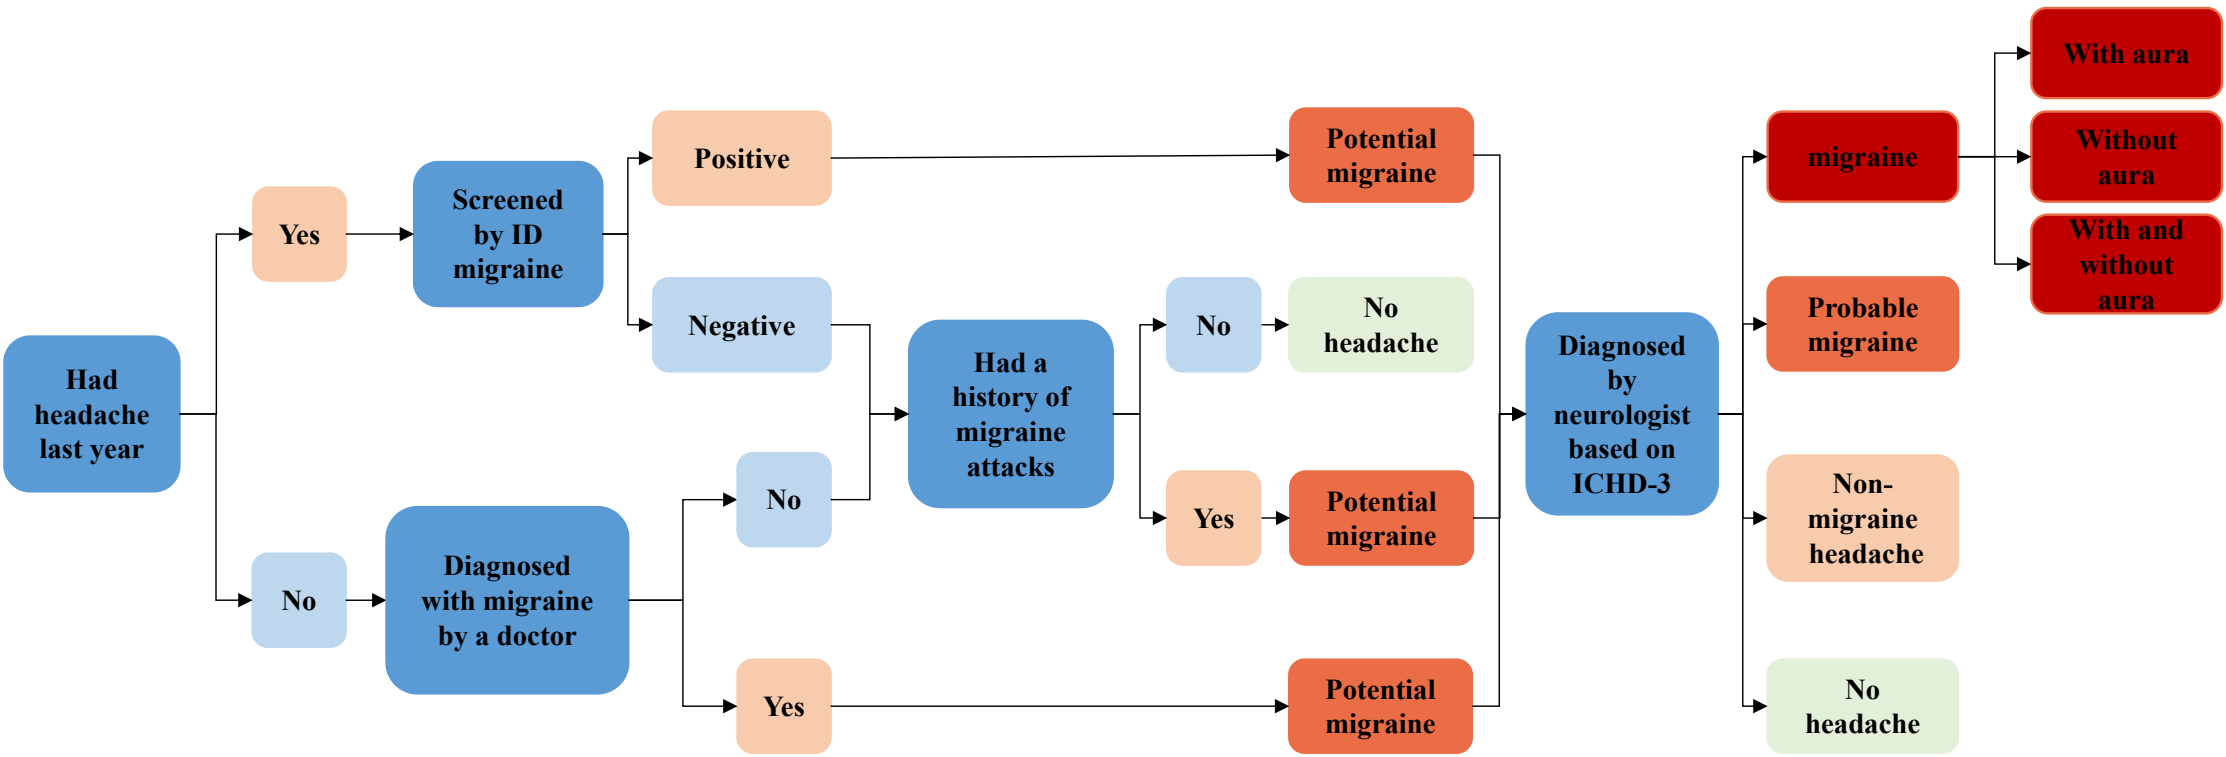

Supplemental Figure 2. Migraine diagnosis procedure.
